# Supplementary material for: Organically templated inorganic–organic hybrid metal (Zn and Cd) Sulfite–oxalates with layered and three-dimensional structures
Source: Royal Society of Chemistry journal article supplement (doi:10.1039/c7dt03073h), 2017-01-01
Supplement: c7dt03073h1.pdf [file c7dt03073h1.pdf]

complex 1 [Zn2(SO3)2(C2O4)0.5 (C6N2H13)].(H2O)2, 1

|    | Cart. Coordinates |          |         |           |          | Vector (M-O/F) |          |          | Unit Vector (M-O/F) |          |          | Distance | Charges  | Z (Protons) | C_Grav   | C_Charge | u_Debye |          |          |          |          |          |          |
|----|-------------------|----------|---------|-----------|----------|----------------|----------|----------|---------------------|----------|----------|----------|----------|-------------|----------|----------|---------|----------|----------|----------|----------|----------|----------|
|    | x                 | y        | z       | Occupancy |          | x              | y        | z        | x                   | y        | z        |          |          |             |          |          | x       | y        | z        |          |          |          |          |
| S1 | 0.71353           | -0.18826 | 0.85352 | 6         | 6.149202 | -4.42524       | 6.865715 | 0.118325 | 1.384268            | 0.669904 | 0.077782 | 0.909962 | 0.440368 | 1.521237    | -1.39346 | 16       | 8       | 0.333333 | 0.441666 | 1.30861  | 15.30923 | 7.408767 | 14.07973 |
| O1 | 0.72726           | -0.12937 | 0.9368  | 1         | 6.267527 | -3.04097       | 7.535619 | -0.12849 | -0.9527             | 1.133239 | -0.08423 | -0.62448 | 0.742819 | 1.525592    | -1.37716 | 8        | 8       | 0.333333 | 0.441238 | -1.41437 | -10.4866 | 12.47385 | 19.35245 |
| O2 | 0.69862           | -0.22879 | 0.9944  | 1         | 6.020707 | -5.37794       | 7.998954 | -0.12849 | -0.9527             | 1.133239 | -0.08423 | -0.62448 | 0.742819 | 1.525592    | -1.37716 | 8        | 8       | 0.333333 | 0.441238 | -1.41437 | -10.4866 | 12.47385 | 19.35245 |
| O3 | 0.53771           | -0.1902  | 0.69482 | 1         | 4.633985 | -4.47084       | 5.589132 | -1.51522 | -0.0456             | -1.27658 | -0.98924 | -0.02977 | -0.83344 | 1.531701    | -1.3546  | 8        | 8       | 0.333333 | 0.440644 | -16.569  | -0.49866 | -13.9596 | 21.53971 |
|    |                   |          |         |           |          |                |          |          |                     |          |          |          |          |             |          |          |         |          |          | -16.6748 | 4.323979 | 5.923067 | 17.63202 |

|    | Cart. Coordinates |          |          |           |          | Vector (M-O/F) |          |          | Unit Vector (M-O/F) |          |          | Distance | Charges  | Z (Protons) | C_Grav   | C_Charge | u_Debye |          |          |          |          |          |          |
|----|-------------------|----------|----------|-----------|----------|----------------|----------|----------|---------------------|----------|----------|----------|----------|-------------|----------|----------|---------|----------|----------|----------|----------|----------|----------|
|    | x                 | y        | z        | Occupancy |          | x              | y        | z        | x                   | y        | z        |          |          |             |          |          | x       | y        | z        |          |          |          |          |
| S2 | 0.658446          | 0.159796 | 0.850667 | 4         | 5.674488 | 3.756165       | 6.842765 |          |                     |          |          |          |          |             |          | 16       | 8       | 0.333333 | 0.441666 | 1.30861  | 15.30923 | 7.408767 | 14.07973 |
| O4 | 0.47125           | 0.143101 | 0.752528 | 1         | 4.061233 | 3.363732       | 6.053335 | -1.61326 | -0.39243            | -0.78943 | -1.05495 | -0.25662 | -0.51623 | 1.529221    | -1.36372 | 8        | 8       | 0.333333 | 0.441433 | -17.7562 | -4.31929 | -8.68883 | 19.46152 |
| O5 | 0.683937          | 0.200943 | 0.718929 | 1         | 5.894169 | 4.723366       | 5.783065 | 0.219681 | 0.967201            | -1.0597  | 0.144947 | 0.638164 | -0.6992  | 1.5156      | -1.41486 | 8        | 8       | 0.333333 | 0.442776 | 2.453866 | 10.80375 | -11.837  | 19.1681  |
| O6 | 0.667743          | 0.195124 | 1.013741 | 1         | 5.754609 | 4.586585       | 8.154533 | 0.080122 | 0.83042             | 1.311767 | 0.05248  | 0.543931 | 0.859217 | 1.526702    | -1.37303 | 8        | 8       | 0.333333 | 0.441678 | 0.884244 | 9.164744 | 14.47703 | 13.63374 |
|    |                   |          |          |           |          |                |          |          |                     |          |          |          |          |             |          |          |         |          |          | -14.4181 | 15.6492  | -6.04877 | 23.80675 |

|     | Cart. Coordinates |          |          |           |          | Vector (M-O/F) |          |          | Unit Vector (M-O/F) |          |          | Distance | Charges  | Z (Protons) | C_Grav   | C_Charge | u_Debye |          |          |          |          |          |          |
|-----|-------------------|----------|----------|-----------|----------|----------------|----------|----------|---------------------|----------|----------|----------|----------|-------------|----------|----------|---------|----------|----------|----------|----------|----------|----------|
|     | x                 | y        | z        | Occupancy |          | x              | y        | z        | x                   | y        | z        |          |          |             |          |          | x       | y        | z        |          |          |          |          |
| Zn1 | 0.344832          | 0.102198 | 0.873131 | 5         | 2.971762 | 2.402266       | 7.023466 |          |                     |          |          |          |          |             |          | 30       | 8       | 0.210526 | 0.232116 | -2.3517  | 2.417311 | 5.786434 | 5.78102  |
| O1  | 0.272744          | 0.129365 | 1.063163 | 1         | 2.350508 | 3.040854       | 8.552083 | -0.62125 | 0.638588            | 1.528617 | -0.31431 | 0.323076 | 0.773364 | 1.976583    | -0.47869 | 8        | 8       | 0.210526 | 0.232116 | -2.3517  | 2.417311 | 5.786434 | 5.78102  |
| O4  | 0.47125           | 0.143101 | 0.752528 | 1         | 4.061233 | 3.363732       | 6.053335 | 1.08947  | 0.961466            | -0.97013 | 0.550499 | 0.48582  | -0.4902  | 1.97906     | -0.47549 | 8        | 8       | 0.210526 | 0.232049 | 4.1109   | 3.6279   | -3.66059 | 7.370162 |
| O7  | 0.576174          | 0.067759 | 1.073877 | 1         | 4.965468 | 1.592743       | 8.638267 | 1.993705 | -0.80952            | 1.614801 | 0.929014 | -0.37722 | 0.752455 | 2.146044    | -0.30279 | 8        | 8       | 0.210526 | 0.228401 | 6.218075 | -2.52478 | 5.036327 | 8.988888 |
| O8  | 0.302754          | 0.016544 | 0.826517 | 1         | 2.609134 | 0.388883       | 6.648503 | -0.36263 | -2.01338            | -0.37496 | -0.17664 | -0.98072 | -0.18265 | 2.052957    | -0.38941 | 8        | 8       | 0.210526 | 0.230235 | -1.25001 | -6.94031 | -1.29253 | 6.638263 |
| N1  | 0.109266          | 0.116369 | 0.638289 | 1         | 0.941654 | 2.73537        | 5.134397 | -2.03011 | 0.333104            | -1.88907 | -0.93989 | 0.154219 | -0.8746  | 2.159932    | -0.30452 | 8        | 8       | 0.210526 | 0.228437 | -6.34494 | 1.041089 | -5.90414 | 9.012585 |
|     |                   |          |          |           |          |                |          |          |                     |          |          |          |          |             |          |          |         |          |          | 0.382321 | -2.37879 | -0.0345  | 2.395599 |

|     | Cart. Coordinates |          |          |           |          | Vector (M-O/F) |          |          | Unit Vector (M-O/F) |          |          | Distance | Charges  | Z (Protons) | C_Grav   | C_Charge | u_Debye |          |          |          |          |          |          |
|-----|-------------------|----------|----------|-----------|----------|----------------|----------|----------|---------------------|----------|----------|----------|----------|-------------|----------|----------|---------|----------|----------|----------|----------|----------|----------|
|     | x                 | y        | z        | Occupancy |          | x              | y        | z        | x                   | y        | z        |          |          |             |          |          | x       | y        | z        |          |          |          |          |
| Zn2 | 0.515575          | 0.242102 | 0.515184 | 4         | 4.443225 | 5.69085        | 4.14414  |          |                     |          |          |          |          |             |          | 30       | 8       | 0.210526 | 0.233472 | -7.42616 | 2.752576 | -0.31015 | 7.969859 |
| O2  | 0.30138           | 0.27121  | 0.5056   | 1         | 2.597293 | 6.375062       | 4.067046 | -1.84593 | 0.684213            | -0.07709 | -0.95131 | 0.352612 | -0.03973 | 1.940413    | -0.52784 | 8        | 8       | 0.210526 | 0.233472 | -7.42616 | 2.752576 | -0.31015 | 7.969859 |
| O3  | 0.462293          | 0.190205 | 0.305176 | 1         | 3.984041 | 4.470959       | 2.454836 | -0.45918 | -1.21989            | -1.6893  | -0.23197 | -0.61626 | -0.85339 | 1.979522    | -0.4749  | 8        | 8       | 0.210526 | 0.232359 | -1.75516 | -4.66285 | -6.45711 | 6.473004 |
| O5  | 0.683937          | 0.200943 | 0.718929 | 1         | 5.894169 | 4.723366       | 5.783065 | 1.450944 | -0.96748            | 1.638925 | 0.745984 | -0.49742 | 0.842632 | 1.945007    | -0.52133 | 8        | 8       | 0.210526 | 0.233335 | 5.801306 | -3.86829 | 6.552911 | 10.59645 |
| O6  | 0.667743          | 0.30488  | 0.5137   | 1         | 5.754609 | 7.166509       | 4.132203 | 1.311384 | 1.47566             | -0.01194 | 0.663175 | 0.74625  | -0.00604 | 1.977433    | -0.47759 | 8        | 8       | 0.210526 | 0.232416 | 5.025927 | 5.65552  | -0.04575 | 7.580138 |
|     |                   |          |          |           |          |                |          |          |                     |          |          |          |          |             |          |          |         |          |          | 1.645915 | -0.12304 | -0.2601  | 1.663027 |

complex 2 [C4N2H12]0.5[Zn2(SO3)2 (C2O4)0.5(H2O)2], 2

|    | Cart. Coordinates |          |          |           |          | Vector (M-O/F) |          |          | Unit Vector (M-O/F) |          |          | Distance | Charges  | Z (Protons) | C_Grav   | C_Charge | u_Debye |          |          |          |          |          |          |
|----|-------------------|----------|----------|-----------|----------|----------------|----------|----------|---------------------|----------|----------|----------|----------|-------------|----------|----------|---------|----------|----------|----------|----------|----------|----------|
|    | x                 | y        | z        | Occupancy |          | x              | y        | z        | x                   | y        | z        |          |          |             |          |          | x       | y        | z        |          |          |          |          |
| S1 | 0.68336           | 0.068622 | 0        | 4         | 7.579146 | 0.761087       | 0        |          |                     |          |          |          |          |             |          | 16       | 8       | 0.333333 | 0.44219  | -1.19146 | -16.7791 | 0        | 16.82136 |
| O1 | 0.673741          | -0.06684 | 0        | 1         | 7.472461 | -0.74133       | 0        | -0.10668 | -1.50242            | 0        | -0.07083 | -0.99749 | 0        | 1.506203    | -1.45125 | 8        | 8       | 0.333333 | 0.44219  | -1.19146 | -16.7791 | 0        | 16.82136 |
| O2 | 0.608622          | 0.108651 | 0.137255 | 1         | 6.750227 | 1.205048       | 1.223628 | -0.82892 | 0.443962            | 1.223628 | -0.53714 | 0.287688 | 0.792915 | 1.543203    | -1.31314 | 8        | 8       | 0.333333 | 0.438563 | -8.89109 | 4.761987 | 13.12479 | 16.55258 |
| O2 | 0.608622          | 0.108651 | 0.137255 | 1         | 6.750227 | 1.205048       | 1.223628 | -0.82892 | 0.443962            | 1.223628 | -0.53714 | 0.287688 | 0.792915 | 1.543203    | -1.31314 | 8        | 8       | 0.333333 | 0.438563 | -8.89109 | 4.761987 | 13.12479 | 16.55258 |
|    |                   |          |          |           |          |                |          |          |                     |          |          |          |          |             |          |          |         |          |          | -18.9736 | -7.25514 | 26.24957 | 33.1915  |

|     | Cart. Coordinates |          |          |           |          | Vector (M-O/F) |          |          | Unit Vector (M-O/F) |          |          | Distance | Charges  | Z (Protons) | C_Grav   | C_Charge | u_Debye |          |          |          |          |          |          |
|-----|-------------------|----------|----------|-----------|----------|----------------|----------|----------|---------------------|----------|----------|----------|----------|-------------|----------|----------|---------|----------|----------|----------|----------|----------|----------|
|     | x                 | y        | z        | Occupancy |          | x              | y        | z        | x                   | y        | z        |          |          |             |          |          | x       | y        | z        |          |          |          |          |
| Zn1 | 0.822446          | -0.17755 | 0        | 6         | 9.121749 | -1.96925       | 0        |          |                     |          |          |          |          |             |          | 30       | 8       | 0.210526 | 0.231302 | -5.96307 | 4.439588 | 0        | 7.434252 |
| O1  | 0.673741          | -0.06684 | 0        | 1         | 7.472461 | -0.74133       | 0        | -1.64929 | 1.227918            | 0        | -0.80211 | 0.59718  | 0        | 2.056193    | -0.38602 | 8        | 8       | 0.210526 | 0.231302 | -5.96307 | 4.439588 | 0        | 7.434252 |
| O1  | 0.673741          | -0.06684 | 0        | 1         | 7.472461 | -0.74133       | 0        | -1.64929 | 1.227918            | 0        | -0.80211 | 0.59718  | 0        | 2.056193    | -0.38602 | 8        | 8       | 0.210526 | 0.231302 | -5.96307 | 4.439588 | 0        | 7.434252 |
| O3  | 0.928713          | -0.07129 | 0.148371 | 1         | 10.30036 | -0.79064       | 1.322727 | 1.178607 | 1.178607            | 1.322727 | 0.55389  | 0.55389  | 0.62162  | 2.127872    | -0.31803 | 8        | 8       | 0.210526 | 0.229858 | 3.957667 | 3.957667 | 4.441611 | 7.145219 |
| O3  | 0.928713          | -0.07129 | 0.148371 | 1         | 10.30036 | -0.79064       | 1.322727 | 1.178607 | 1.178607            | 1.322727 | 0.55389  | 0.55389  | 0.62162  | 2.127872    | -0.31803 | 8        | 8       | 0.210526 | 0.229858 | 3.957667 | 3.957667 | 4.441611 | 7.145219 |
| O1W | 0.737047          | -0.26295 | 0.178623 | 1         | 8.174588 | -2.91641       | 1.592424 | -0.94716 | -0.94716            | 1.592424 | -0.45517 | -0.45517 | 0.765267 | 2.080875    | -0.36111 | 8        | 8       | 0.210526 | 0.230774 | -3.33509 | -3.33509 | 5.607157 | 7.327064 |
| O1W | 0.737047          | -0.26295 | 0.178623 | 1         | 8.174588 | -2.91641       | 1.592424 | -0.94716 | -0.94716            | 1.592424 | -0.45517 | -0.45517 | 0.765267 | 2.080875    | -0.36111 | 8        | 8       | 0.210526 | 0.230774 | -3.33509 | -3.33509 | 5.607157 | 7.327064 |
|     |                   |          |          |           |          |                |          |          |                     |          |          |          |          |             |          |          |         |          |          | -10.681  | 10.12433 | 20.09754 | 24.90976 |

|     |          |          |          | Cart. Coordinates | Vector (M-O/F) |          |          | Unit Vector (M-O/F) |          |          | Distance | Charges  | Z (Protons) | C_Grav   | C_Charge | u_Debye |          |          |          |          |          |         |
|-----|----------|----------|----------|-------------------|----------------|----------|----------|---------------------|----------|----------|----------|----------|-------------|----------|----------|---------|----------|----------|----------|----------|----------|---------|
|     |          |          |          | x                 | y              | z        | x        | y                   | z        | x        | y        | z        |             |          |          | x       | y        | z        |          |          |          |         |
| Zn2 |          | 0.5      | 0        | 0.25              | 4              | 5.5455   | 0        | 2.22875             |          |          |          |          | 1.90574     | 30       |          |         |          |          |          |          |          |         |
| O2  | 0.608622 | 0.108651 | 0.137255 | 1                 | 6.750227       | 1.205048 | 1.223628 | 1.204727            | 1.205048 | -1.00512 | 0.608962 | 0.609125 | -0.50807    | 1.978327 | -0.47644 | 8       | 0.210526 | 0.231782 | 4.495123 | 4.496323 | -3.75035 | 7.38161 |
| O2  | 0.608622 | 0.108651 | 0.137255 | 1                 | 6.750227       | 1.205048 | 1.223628 | 1.204727            | 1.205048 | -1.00512 | 0.608962 | 0.609125 | -0.50807    | 1.978327 | -0.47644 | 8       | 0.210526 | 0.231782 | 4.495123 | 4.496323 | -3.75035 | 7.38161 |
| O2  | 0.608622 | 0.108651 | 0.137255 | 1                 | 6.750227       | 1.205048 | 1.223628 | 1.204727            | 1.205048 | -1.00512 | 0.608962 | 0.609125 | -0.50807    | 1.978327 | -0.47644 | 8       | 0.210526 | 0.231782 | 4.495123 | 4.496323 | -3.75035 | 7.38161 |
| O2  | 0.608622 | 0.108651 | 0.137255 | 1                 | 6.750227       | 1.205048 | 1.223628 | 1.204727            | 1.205048 | -1.00512 | 0.608962 | 0.609125 | -0.50807    | 1.978327 | -0.47644 | 8       | 0.210526 | 0.231782 | 4.495123 | 4.496323 | -3.75035 | 7.38161 |
|     |          |          |          |                   |                |          |          |                     |          |          |          |          |             |          |          |         | 17.98049 | 17.98529 | -15.0014 | 29.52644 |          |         |

complex 3 [C4N2H12][Cd2(SO3)2(C2O4)](H2O).H2O 3

|    |          |          |          | Cart. Coordinates | Vector (M-O/F) |          |          | Unit Vector (M-O/F) |          |          | Distance | Charges  | Z (Protons) | C_Grav   | C_Charge | u_Debye |          |          |          |          |          |          |
|----|----------|----------|----------|-------------------|----------------|----------|----------|---------------------|----------|----------|----------|----------|-------------|----------|----------|---------|----------|----------|----------|----------|----------|----------|
|    |          |          |          | x                 | y              | z        | x        | y                   | z        | x        | y        | z        |             |          |          | x       | y        | z        |          |          |          |          |
| S1 | 0.121568 | 0.377682 | 0.767288 | 6                 | 0.756518       | 3.03645  | 12.83596 |                     |          |          |          |          | 4.079845    | 16       |          |         |          |          |          |          |          |          |
| O5 | 0.052457 | 0.53222  | 0.82169  | 1                 | 0.32644        | 4.278889 | 13.74605 | -0.43008            | 1.242439 | 0.910091 | -0.28134 | 0.812743 | 0.595337    | 1.528698 | -1.36565 | 8       | 0.333333 | 0.439995 | -4.68691 | 13.53988 | 9.918007 | 16.46397 |
| O6 | 0.355502 | 0.266599 | 0.795358 | 1                 | 2.212289       | 2.143376 | 13.30554 | 1.455771            | -0.89307 | 0.469583 | 0.952521 | -0.58434 | 0.307251    | 1.528336 | -1.36698 | 8       | 0.333333 | 0.44003  | 15.87096 | -9.73638 | 5.119439 | 16.80239 |
| O7 | -0.02285 | 0.261769 | 0.797958 | 1                 | -0.14217       | 2.104544 | 13.34904 | -0.89869            | -0.93191 | 0.513078 | -0.58595 | -0.60761 | 0.334531    | 1.533725 | -1.34722 | 8       | 0.333333 | 0.43951  | -9.74074 | -10.1008 | 5.561176 | 16.62596 |
|    |          |          |          |                   |                |          |          |                     |          |          |          |          |             |          |          |         | 1.443308 | -6.29728 | 20.59862 | 21.24786 |          |          |

|     |          |          |          | Cart. Coordinates | Vector (M-O/F) |          |          | Unit Vector (M-O/F) |          |          | Distance | Charges  | Z (Protons) | C_Grav   | C_Charge | u_Debye |          |          |          |          |          |          |
|-----|----------|----------|----------|-------------------|----------------|----------|----------|---------------------|----------|----------|----------|----------|-------------|----------|----------|---------|----------|----------|----------|----------|----------|----------|
|     |          |          |          | x                 | y              | z        | x        | y                   | z        | x        | y        | z        |             |          |          | x       | y        | z        |          |          |          |          |
| S2  | 0.761234 | 0.96125  | 0.938041 | 4                 | 4.737159       | 7.728162 | 15.69249 |                     |          |          |          |          | 4.039581    | 16       |          |         |          |          |          |          |          |          |
| O8  | 0.624743 | 0.895489 | 0.879742 | 1                 | 3.887776       | 7.199463 | 14.7172  | -0.84938            | -0.5287  | -0.97528 | -0.54997 | -0.34233 | -0.63149    | 1.544416 | -1.30885 | 8       | 0.333333 | 0.437667 | -9.04733 | -5.63151 | -10.3884 | 16.489   |
| O9  | 0.764759 | 0.846604 | 1.014719 | 1                 | 4.759095       | 6.806442 | 16.97523 | 0.021936            | -0.92172 | 1.282746 | 0.014384 | -0.60441 | 0.84115     | 1.52499  | -1.3794  | 8       | 0.333333 | 0.439526 | 0.238608 | -10.0259 | 13.95295 | 16.74187 |
| O10 | 0.999215 | 0.892788 | 0.899816 | 1                 | 6.218115       | 7.177748 | 15.05302 | 1.480956            | -0.55041 | -0.63947 | 0.966306 | -0.35914 | -0.41724    | 1.532596 | -1.35133 | 8       | 0.333333 | 0.438788 | 15.97596 | -5.93764 | -6.8983  | 16.36845 |
|     |          |          |          |                   |                |          |          |                     |          |          |          |          |             |          |          |         | 7.167238 | -21.5951 | -3.33372 | 20.88051 |          |          |

|     |          |          |          | Cart. Coordinates | Vector (M-O/F) |          |          | Unit Vector (M-O/F) |          |          | Distance | Charges  | Z (Protons) | C_Grav   | C_Charge | u_Debye |          |          |          |          |          |          |
|-----|----------|----------|----------|-------------------|----------------|----------|----------|---------------------|----------|----------|----------|----------|-------------|----------|----------|---------|----------|----------|----------|----------|----------|----------|
|     |          |          |          | x                 | y              | z        | x        | y                   | z        | x        | y        | z        |             |          |          | x       | y        | z        |          |          |          |          |
| Cd1 | -0.10857 | 0.808439 | 0.771352 | 7                 | -0.67563       | 6.499041 | 12.90395 |                     |          |          |          |          | 1.743739    | 48       |          |         |          |          |          |          |          |          |
| O1  | 0.267    | 0.8564   | 0.76361  | 1                 | 1.661541       | 6.8846   | 12.77443 | 2.337172            | 0.385558 | -0.12952 | 0.94211  | 0.155418 | -0.05221    | 2.480784 | -0.21037 | 8       | 0.142857 | 0.150741 | 4.817472 | 0.794728 | -0.26696 | 5.109727 |
| O2  | -0.3928  | 0.7531   | 0.70157  | 1                 | -2.44439       | 6.054171 | 11.73656 | -1.76876            | -0.44487 | -1.16738 | -0.75717 | -0.19044 | -0.49973    | 2.336026 | -0.3111  | 8       | 0.142857 | 0.152309 | -4.37887 | -1.10135 | -2.89005 | 5.81248  |
| O3  | 0.076237 | 0.736637 | 0.650506 | 1                 | 0.474423       | 5.921825 | 10.88231 | 1.150054            | -0.57722 | -2.02163 | 0.50172  | -0.25181 | -0.88195    | 2.292225 | -0.3502  | 8       | 0.142857 | 0.152916 | 3.032144 | -1.52184 | -5.33008 | 5.971133 |
| O5  | 0.052457 | 0.532226 | 0.82169  | 1                 | 0.32644        | 4.278565 | 13.74605 | 1.002071            | -2.22048 | 0.842104 | 0.444441 | -0.98483 | 0.373492    | 2.254676 | -0.3876  | 8       | 0.142857 | 0.153496 | 2.796197 | -6.19606 | 2.349823 | 6.351357 |
| O8  | -0.3753  | 0.8955   | 0.87974  | 1                 | -2.33549       | 7.198925 | 14.71717 | -1.65986            | 0.699883 | 1.813223 | -0.69655 | 0.2937   | 0.760903    | 2.382988 | -0.27402 | 8       | 0.142857 | 0.151733 | -3.85601 | 1.625895 | 4.212287 | 5.460685 |
| O10 | -0.0008  | 0.8928   | 0.89982  | 1                 | -0.00498       | 7.177219 | 15.05309 | 0.670653            | 0.678178 | 2.149141 | 0.270353 | 0.273387 | 0.866361    | 2.480654 | -0.21045 | 8       | 0.142857 | 0.150742 | 1.38258  | 1.398094 | 4.430549 | 5.113736 |
| O1W | -0.24775 | 1.093869 | 0.711886 | 1                 | -1.54172       | 8.793613 | 11.90913 | -0.86609            | 2.294572 | -0.99482 | -0.368   | 0.974947 | -0.42269    | 2.353536 | -0.29672 | 8       | 0.142857 | 0.152086 | -2.09291 | 5.544839 | -2.40397 | 5.744858 |
|     |          |          |          |                   |                |          |          |                     |          |          |          |          |             |          |          |         | 3.793514 | -5.00053 | 2.505564 | 5.818381 |          |          |

|     |          |          |          | Cart. Coordinates | Vector (M-O/F) |          |          | Unit Vector (M-O/F) |          |          | Distance | Charges  | Z (Protons) | C_Grav   | C_Charge | u_Debye |          |          |          |          |          |          |
|-----|----------|----------|----------|-------------------|----------------|----------|----------|---------------------|----------|----------|----------|----------|-------------|----------|----------|---------|----------|----------|----------|----------|----------|----------|
|     |          |          |          | x                 | y              | z        | x        | y                   | z        | x        | y        | z        |             |          |          | x       | y        | z        |          |          |          |          |
| Cd2 | 0.252597 | 1.038925 | 0.863979 | 6                 | 1.571911       | 8.351918 | 14.4535  |                     |          |          |          |          | 2.114731    | 48       |          |         |          |          |          |          |          |          |
| O1  | 0.26697  | 0.856376 | 0.76361  | 1                 | 1.661354       | 6.884407 | 12.77443 | 0.089443            | -1.46751 | -1.67907 | 0.039158 | -0.64247 | -0.73509    | 2.284167 | -0.35791 | 8       | 0.142857 | 0.154082 | 0.26141  | -4.289   | -4.90732 | 6.615611 |
| O6  | 0.3555   | 1.2666   | 0.79536  | 1                 | 2.212277       | 10.1822  | 13.30558 | 0.640365            | 1.830279 | -1.14793 | 0.274229 | 0.783797 | -0.49159    | 2.335145 | -0.31184 | 8       | 0.142857 | 0.153363 | 1.75019  | 5.002357 | -3.13741 | 6.410782 |
| O7  | -0.0228  | 1.2618   | 0.79796  | 1                 | -0.14188       | 10.14361 | 13.34907 | -1.7138             | 1.791692 | -1.10443 | -0.73971 | 0.773328 | -0.47669    | 2.31686  | -0.32764 | 8       | 0.142857 | 0.15361  | -4.79539 | 5.013348 | -3.09032 | 6.566037 |
| O8  | 0.624743 | 0.895489 | 0.879742 | 1                 | 3.887776       | 7.198836 | 14.7172  | 2.315865            | -1.15308 | 0.263699 | 1.02423  | -0.50997 | 0.116625    | 2.261078 | -0.38095 | 8       | 0.142857 | 0.154441 | 6.988025 | -3.47938 | 0.795701 | 6.844537 |
| O9  | 0.2352   | 1.1534   | 0.98528  | 1                 | 1.46365        | 9.272183 | 16.48275 | -0.10826            | 0.920265 | 2.029244 | -0.04773 | 0.405711 | 0.89462     | 2.268276 | -0.37361 | 8       | 0.142857 | 0.154327 | -0.32341 | 2.749069 | 6.06188  | 6.726518 |
| O10 | -0.0008  | 0.8928   | 0.89982  | 1                 | -0.00498       | 7.177219 | 15.05309 | -1.57689            | -1.1747  | 0.599584 | -0.69187 | -0.51541 | 0.263071    | 2.279175 | -0.36277 | 8       | 0.142857 | 0.154158 | -4.64022 | -3.45672 | 1.764361 | 6.701216 |
|     |          |          |          |                   |                |          |          |                     |          |          |          |          |             |          |          |         | -0.75939 | 1.539676 | -2.51311 | 2.899167 |          |          |
