# Supplementary material for: Organically templated inorganic–organic hybrid metal (Zn and Cd) Sulfite–oxalates with layered and three-dimensional structures
Source: Royal Society of Chemistry journal article supplement (doi:10.1039/c7dt03073h), 2017-01-01
Supplement: c7dt03073h2.pdf [file c7dt03073h2.pdf]

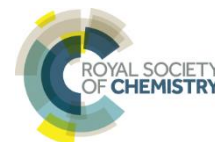

**Journal Name**

ARTICLE

Supporting Information

**Organically-templated inorganic-organic hybrid Metal (Zn and Cd) Sulphite-Oxalate  
with layered and three-dimensional structures**

**Ranjay K. Tiwari<sup>a,b</sup>, Jitendra Kumar<sup>a,b</sup>, and J. N. Behera<sup>a,b\*</sup>**

*<sup>a</sup> School of Chemical Sciences, National Institute of Science and Educational Research (NISER), P.O. Jatni, Khurda  
752050, Odisha, India.*

*<sup>b</sup> Homi Bhabha National Institute, Mumbai, India*

\*e-mail:jnbehera@niser.ac.in

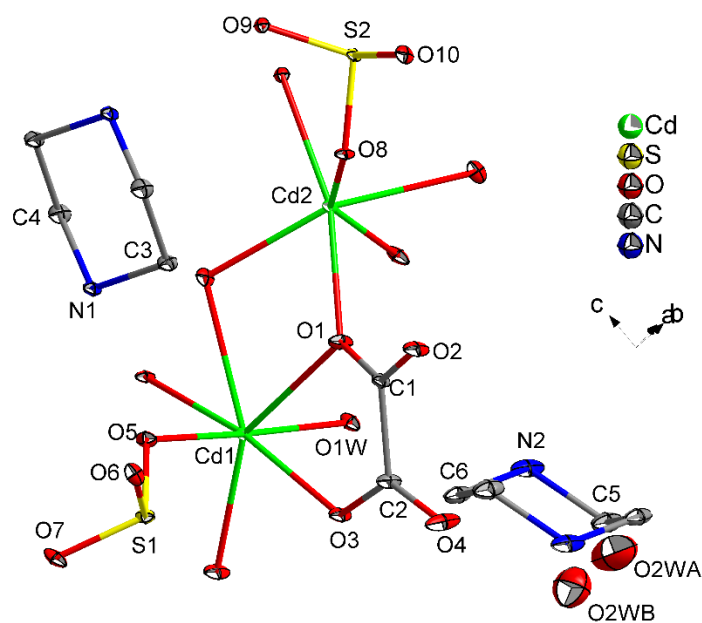

Fig. S1 Asymmetric unit of  $[\text{C}_4\text{N}_2\text{H}_{12}][\text{Cd}_2(\text{SO}_3)_2(\text{C}_2\text{O}_4)(\text{H}_2\text{O})].(\text{H}_2\text{O})$  **3** with 15% ellipsoidal probability.

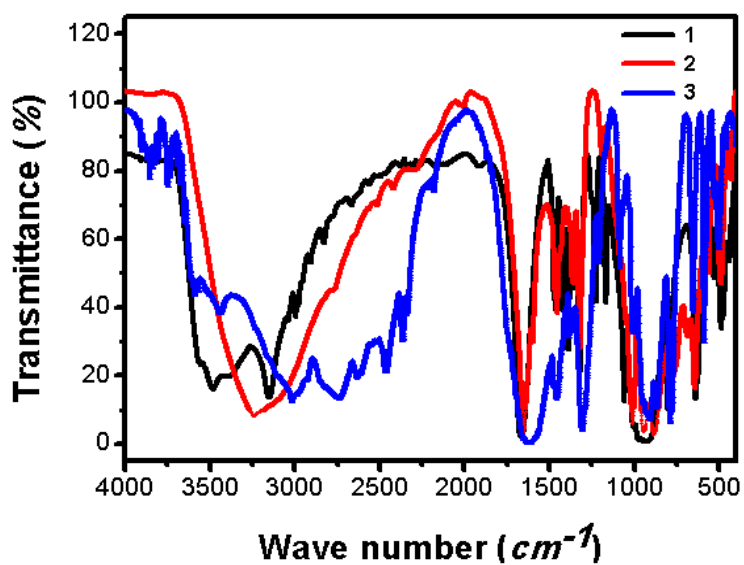

Fig. S2 FTIR spectra of  $[\text{Zn}_2(\text{SO}_3)_2(\text{C}_2\text{O}_4)_{0.5}(\text{C}_6\text{N}_2\text{H}_{13})].(\text{H}_2\text{O})_2$ , **1**;  $[\text{C}_4\text{N}_2\text{H}_{12}]_{0.5}[\text{Zn}_2(\text{SO}_3)_2(\text{C}_2\text{O}_4)_{0.5}(\text{H}_2\text{O})_2]$ , **2**; and  $[\text{C}_4\text{N}_2\text{H}_{12}][\text{Cd}_2(\text{SO}_3)_2(\text{C}_2\text{O}_4)(\text{H}_2\text{O})].(\text{H}_2\text{O})$  **3**.

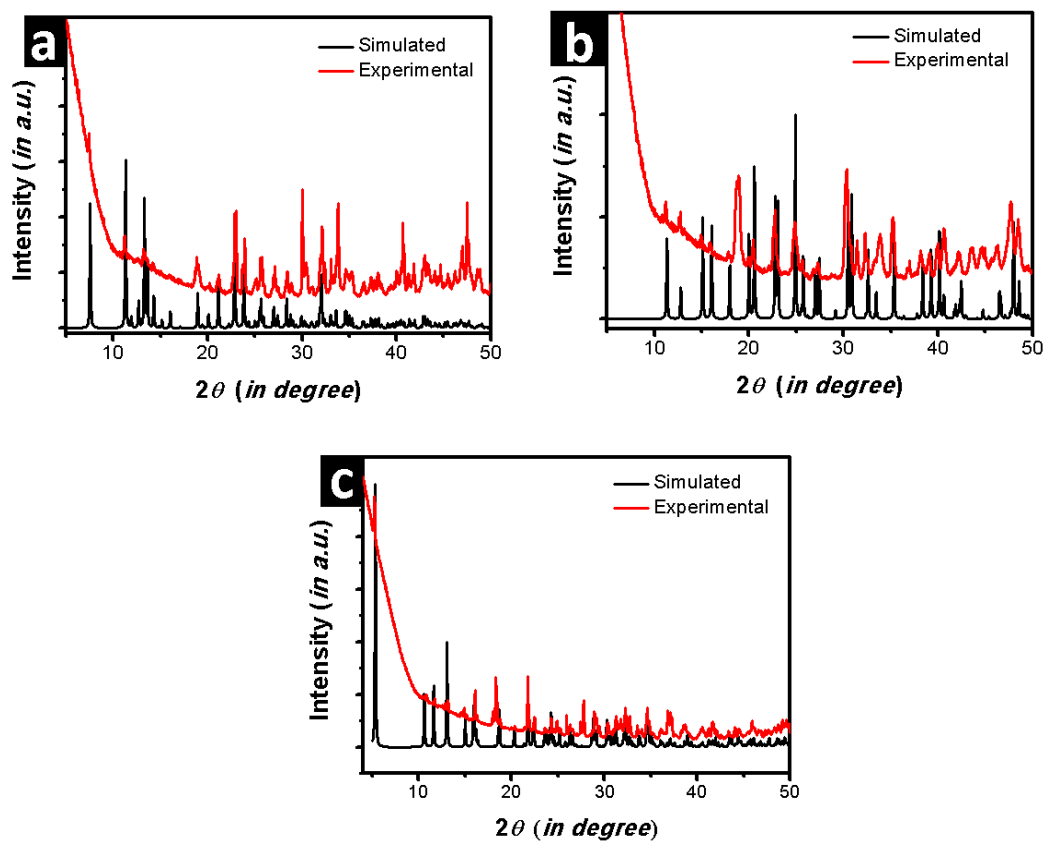

**Fig. S3** PXRD pattern for (a)  $[\text{Zn}_2(\text{SO}_3)_2(\text{C}_2\text{O}_4)_{0.5}(\text{C}_6\text{N}_2\text{H}_{13})] \cdot (\text{H}_2\text{O})_2$ , **1**; and (b)  $[\text{C}_4\text{N}_2\text{H}_{12}]_{0.5}[\text{Zn}_2(\text{SO}_3)_2(\text{C}_2\text{O}_4)_{0.5}(\text{H}_2\text{O})_2]$ , **2**; and (c)  $[\text{C}_4\text{N}_2\text{H}_{12}][\text{Cd}_2(\text{SO}_3)_2(\text{C}_2\text{O}_4)(\text{H}_2\text{O})] \cdot (\text{H}_2\text{O})$ , **3**.

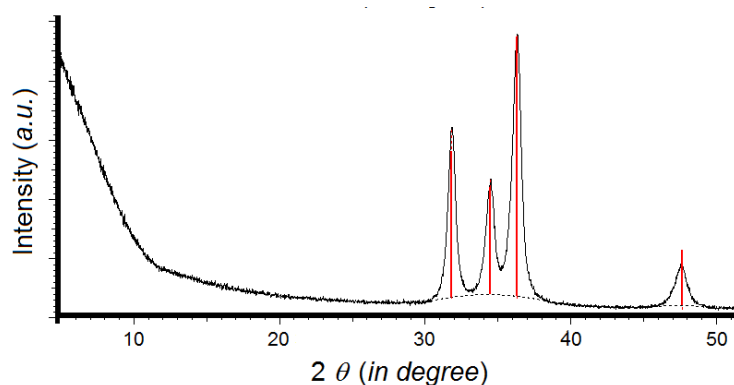

**Fig. S4** Post calcination PXRD analysis of  $[\text{Zn}_2(\text{SO}_3)_2(\text{C}_2\text{O}_4)_{0.5}(\text{C}_6\text{N}_2\text{H}_{13})] \cdot (\text{H}_2\text{O})_2$ , **1** and  $[\text{C}_4\text{N}_2\text{H}_{12}]_{0.5}[\text{Zn}_2(\text{SO}_3)_2(\text{C}_2\text{O}_4)_{0.5}(\text{H}_2\text{O})_2]$ , **2** showing formation of ZnO (PDF-01-075-0576)

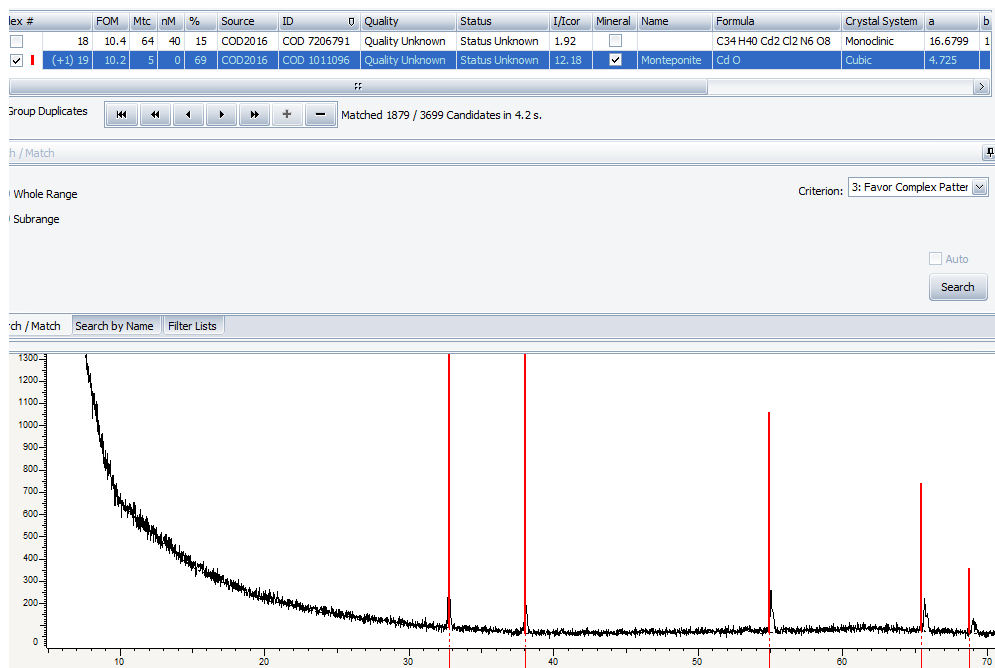

**Fig. S5** Post calcination PXR analysis of  $[\text{C}_4\text{N}_2\text{H}_{12}][\text{Cd}_2(\text{SO}_3)_2(\text{C}_2\text{O}_4)(\text{H}_2\text{O})] \cdot (\text{H}_2\text{O})$  **3** showing formation of CdO (COD-1011096)

**Table S1.** Hydrogen bonding table for complexes **1-3**.#

| D-H...A                                                                                                                                                                              | Symmetry of A      | D-H     | H...A   | D-A       | ∠D-H...A |
|--------------------------------------------------------------------------------------------------------------------------------------------------------------------------------------|--------------------|---------|---------|-----------|----------|
| <b>[Zn<sub>2</sub>(SO<sub>3</sub>)<sub>2</sub>(C<sub>2</sub>O<sub>4</sub>)<sub>0.5</sub>(C<sub>6</sub>N<sub>2</sub>H<sub>13</sub>)]·(H<sub>2</sub>O)<sub>2</sub>, 1</b>              |                    |         |         |           |          |
| N2-H2...O6                                                                                                                                                                           | -1+x,y,-1+z        | 0.91    | 2.18    | 2.908(2)  | 136      |
| N2-H2...O7                                                                                                                                                                           | -1+x,y,-1+z        | 0.91    | 2.32    | 2.917(2)  | 123      |
| C2-H2B...O4                                                                                                                                                                          |                    | 0.97    | 2.54    | 3.108(3)  | 117      |
| C6-H6A...O2                                                                                                                                                                          | x,1/2-y,-1/2+z     | 0.97    | 2.40    | 3.304(3)  | 155      |
| C6-H6B...O2                                                                                                                                                                          |                    | 0.97    | 2.57    | 3.201(3)  | 123      |
| <b>[C<sub>4</sub>N<sub>2</sub>H<sub>12</sub>]<sub>0.5</sub>[Zn<sub>2</sub>(SO<sub>3</sub>)<sub>2</sub>(C<sub>2</sub>O<sub>4</sub>)<sub>0.5</sub>(H<sub>2</sub>O)<sub>2</sub>], 2</b> |                    |         |         |           |          |
| N1-H1A...O3                                                                                                                                                                          | y,x,1-z            | 0.90    | 2.28    | 3.146(5)  | 161      |
| O1W-H1W...O2                                                                                                                                                                         | 1/2+y,1/2-x,1/2-z  | 0.78(6) | 2.00(5) | 2.767(5)  | 172(6)   |
| C2-H2A...O1W                                                                                                                                                                         | 1/2-x,-1/2+y,1/2-z | 0.97    | 2.49    | 2.879(12) | 104      |
| C2-H2B...O3                                                                                                                                                                          |                    | 0.97    | 2.24    | 3.023(12) | 137      |
| <b>[C<sub>4</sub>N<sub>2</sub>H<sub>12</sub>][Cd<sub>2</sub>(SO<sub>3</sub>)<sub>2</sub>(C<sub>2</sub>O<sub>4</sub>)(H<sub>2</sub>O)]·(H<sub>2</sub>O), 3</b>                        |                    |         |         |           |          |
| O2WA-H2WA...O1W                                                                                                                                                                      | 2-x,-y,1-z         | 0.85    | 2.15    | 2.997(13) | 171      |
| N1-H1A...O9                                                                                                                                                                          | 2-x,1-y,-z         | 0.89    | 2       | 2.812(4)  | 150      |
| N1-H1B...O5                                                                                                                                                                          |                    | 0.89    | 1.91    | 2.777(4)  | 164      |
| O2WA-H2WB...O4                                                                                                                                                                       |                    | 0.85    | 2.06    | 2.901(12) | 168      |
| N2-H2A...O3                                                                                                                                                                          | -1+x,y,z           | 0.89    | 1.88    | 2.751(5)  | 166      |
| N2-H2B...O2                                                                                                                                                                          | -1+x,y,z           | 0.89    | 2.52    | 3.009(5)  | 116      |
| N2-H2B...O4                                                                                                                                                                          |                    | 0.89    | 1.86    | 2.689(5)  | 154      |
| O1W-H1WA...O6                                                                                                                                                                        | 1+x,-1+y,z         | 0.83(5) | 1.91(6) | 2.728(4)  | 167(6)   |
| O1W-H1WB...O7                                                                                                                                                                        | x,-1+y,z           | 0.83(6) | 1.88(6) | 2.672(4)  | 161(6)   |
| C3-H3A...O8                                                                                                                                                                          | -1+x,y,z           | 0.97    | 2.52    | 3.429(5)  | 156      |
| C3-H3B...O7                                                                                                                                                                          | -1+x,y,z           | 0.97    | 2.56    | 3.334(5)  | 137      |
| C4-H4A...O5                                                                                                                                                                          | 2-x,1-y,-z         | 0.97    | 2.55    | 3.372(6)  | 142      |
| C4-H4B...O10                                                                                                                                                                         |                    | 0.97    | 2.56    | 3.295(6)  | 133      |
| C6-H6A...O4                                                                                                                                                                          | 1-x,1-y,1-z        | 0.97    | 2.45    | 3.370(6)  | 158      |

#Where 'D' is donor and 'A' is acceptor, the bond lengths are in (Å) and angles are in (°).

---

**Table S2.** Complete list of bond lengths [ $\text{\AA}$ ] and bond angles [ $^\circ$ ] for complex 1-3<sup>#</sup>

---

| <b>[Zn<sub>2</sub>(SO<sub>3</sub>)<sub>2</sub>(C<sub>2</sub>O<sub>4</sub>)<sub>0.5</sub>(C<sub>6</sub>N<sub>2</sub>H<sub>13</sub>)]·(H<sub>2</sub>O)<sub>2</sub>, 1</b>              |            |                                       |            |                                        |            |                                     |            |
|--------------------------------------------------------------------------------------------------------------------------------------------------------------------------------------|------------|---------------------------------------|------------|----------------------------------------|------------|-------------------------------------|------------|
| Zn1-O1                                                                                                                                                                               | 1.9766(14) | Zn1-O8                                | 2.0528(14) | S2-O6                                  | 1.5267(14) | N2-C5                               | 1.489(3)   |
| Zn2-O2 <sup>a</sup>                                                                                                                                                                  | 1.9406(14) | Zn1-N1                                | 2.1601(14) | O7-C1                                  | 1.241(2)   | N2-C7                               | 1.490(3)   |
| Zn2-O3                                                                                                                                                                               | 1.9795(14) | S1-O1                                 | 1.5213(14) | O8-C1 <sup>e</sup>                     | 1.258(2)   | C1-C1 <sup>e</sup>                  | 1.540(3)   |
| Zn1-O4                                                                                                                                                                               | 1.9791(14) | S1-O2                                 | 1.5254(15) | N1-C2                                  | 1.472(3)   | C3-C2                               | 1.529(3)   |
| Zn2-O5                                                                                                                                                                               | 1.9451(13) | S1-O3 <sup>b</sup>                    | 1.5318(14) | N1-C4                                  | 1.480(2)   | C5-C4                               | 1.529(3)   |
| Zn2-O6 <sup>a</sup>                                                                                                                                                                  | 1.9772(14) | S2-O4                                 | 1.5293(14) | N1-C6                                  | 1.476(2)   | C6-C7                               | 1.515(3)   |
| Zn1-O7                                                                                                                                                                               | 2.1461(13) | S2-O5                                 | 1.5156(14) | N2-C3                                  | 1.492(3)   |                                     |            |
| O1-Zn1-O4                                                                                                                                                                            | 129.22(7)  | O2 <sup>a</sup> -Zn2-O6 <sup>a</sup>  | 111.06(6)  | S2-O4-Zn1                              | 123.20(9)  | C5-N2-C7                            | 110.14(17) |
| O1-Zn1-O7                                                                                                                                                                            | 91.66(6)   | O5-Zn2-O3                             | 104.22(6)  | S2-O5-Zn2                              | 129.43(8)  | C7-N2-C3                            | 109.60(16) |
| O1-Zn1-O8                                                                                                                                                                            | 111.73(6)  | O5-Zn2-O6 <sup>a</sup>                | 96.20(6)   | S2-O6-Zn2 <sup>d</sup>                 | 127.51(8)  | O7-C1-O8 <sup>e</sup>               | 126.28(16) |
| O1-Zn1-N1                                                                                                                                                                            | 98.42(6)   | O6 <sup>a</sup> -Zn2-O3               | 112.20(6)  | S1-O2-Zn2 <sup>d</sup>                 | 123.94(8)  | O7-C1-C1 <sup>e</sup>               | 116.97(19) |
| O4-Zn1-O7                                                                                                                                                                            | 91.36(6)   | O1-S1-O2                              | 104.83(8)  | C1-O7-Zn1                              | 112.39(11) | O8 <sup>e</sup> -C1-C1 <sup>e</sup> | 116.8(2)   |
| O4-Zn1-O8                                                                                                                                                                            | 118.58(7)  | O1-S1-O3 <sup>b</sup>                 | 105.46(8)  | C1 <sup>e</sup> -O8-Zn1                | 114.96(12) | N1-C2-C3                            | 112.00(16) |
| O4-Zn1-N1                                                                                                                                                                            | 90.30(6)   | O2-S1-O3 <sup>b</sup>                 | 104.21(8)  | C2-N1-C6                               | 108.09(18) | N2-C3-C2                            | 107.80(16) |
| O7-Zn1-N1                                                                                                                                                                            | 165.50(6)  | O5-S2-O6                              | 106.38(8)  | C2-N1-C4                               | 108.19(17) | N1-C4-C5                            | 111.44(16) |
| O8-Zn1-O7                                                                                                                                                                            | 78.93(5)   | O5-S2-O4                              | 103.10(8)  | C2-N1-Zn1                              | 108.93(11) | N2-C5-C4                            | 108.30(15) |
| O8-Zn1-N1                                                                                                                                                                            | 87.64(5)   | O6-S2-O4                              | 104.89(8)  | C6-N1-Zn1                              | 110.51(11) | N1-C6-C7                            | 111.96(17) |
| O2 <sup>a</sup> -Zn2-O3                                                                                                                                                              | 107.36(6)  | S1-O1-Zn1                             | 129.96(9)  | C6-N1-C4                               | 108.09(17) | N2-C7-C6                            | 108.34(16) |
| O2 <sup>a</sup> -Zn2-O5                                                                                                                                                              | 125.35(6)  | S1 <sup>c</sup> -O3-Zn2               | 122.34(8)  | C5-N2-C3                               | 109.49(17) |                                     |            |
| <b>[C<sub>4</sub>N<sub>2</sub>H<sub>12</sub>]<sub>0.5</sub>[Zn<sub>2</sub>(SO<sub>3</sub>)<sub>2</sub>(C<sub>2</sub>O<sub>4</sub>)<sub>0.5</sub>(H<sub>2</sub>O)<sub>2</sub>], 2</b> |            |                                       |            |                                        |            |                                     |            |
| Zn1-O1                                                                                                                                                                               | 2.056(4)   | Zn1-O1W                               | 2.081(4)   | C1-O3                                  | 1.252(5)   | C2-C2 <sup>n</sup>                  | 1.474(19)  |
| Zn2-O2                                                                                                                                                                               | 1.978(3)   | S1-O1                                 | 1.506(4)   | C1-C1 <sup>l</sup>                     | 1.518(15)  | N1-C2                               | 1.457(11)  |
| Zn1-O3                                                                                                                                                                               | 2.128(4)   | S1-O2                                 | 1.543(3)   |                                        |            |                                     |            |
| O1 <sup>l</sup> -Zn1-O1                                                                                                                                                              | 163.3(2)   | O1W-Zn1-O3 <sup>j</sup>               | 168.50(18) | O2 <sup>l</sup> -S1-O2                 | 104.9(2)   | C2 <sup>m</sup> -N1-C2              | 107.5(12)  |
| O1-Zn1-O3                                                                                                                                                                            | 96.52(9)   | O1W <sup>l</sup> -Zn1-O1W             | 99.9(3)    | S1-O1-Zn1                              | 122.6(3)   | O3 <sup>k</sup> -C1-O3              | 126.5(7)   |
| O1-Zn1-O1W                                                                                                                                                                           | 84.65(8)   | O2 <sup>l</sup> -Zn2-O2               | 118.93(15) | S1-O2-Zn2                              | 123.69(17) | O3-C1-C1 <sup>l</sup>               | 116.8(4)   |
| O3-Zn1-O3 <sup>j</sup>                                                                                                                                                               | 76.9(2)    | O2 <sup>a</sup> -Zn2-O2               | 104.96(7)  | C1-O3-Zn1                              | 114.8(4)   | N1-C2-C2 <sup>n</sup>               | 107.4(9)   |
| O1W-Zn1-O3                                                                                                                                                                           | 91.63(17)  | O1-S1-O2                              | 104.41(16) |                                        |            |                                     |            |
| <b>[C<sub>4</sub>N<sub>2</sub>H<sub>12</sub>][Cd<sub>2</sub>(SO<sub>3</sub>)<sub>2</sub>(C<sub>2</sub>O<sub>4</sub>)(H<sub>2</sub>O)]·(H<sub>2</sub>O), 3</b>                        |            |                                       |            |                                        |            |                                     |            |
| Cd1-O1                                                                                                                                                                               | 2.481(3)   | Cd2-O6 <sup>q</sup>                   | 2.335(3)   | S1-O7                                  | 1.534(3)   | C2-C1                               | 1.566(5)   |
| Cd1-O2 <sup>o</sup>                                                                                                                                                                  | 2.336(3)   | Cd2-O7 <sup>q</sup>                   | 2.317(3)   | S2-O8                                  | 1.545(3)   | N1-C3                               | 1.490(5)   |
| Cd1-O3                                                                                                                                                                               | 2.292(3)   | Cd2-O8                                | 2.261(3)   | S2-O9                                  | 1.525(3)   | N1-C4                               | 1.490(5)   |
| Cd1-O5                                                                                                                                                                               | 2.255(3)   | Cd2-O9 <sup>p</sup>                   | 2.268(3)   | S2-O10                                 | 1.533(3)   | N2-C6                               | 1.480(7)   |
| Cd1-O8 <sup>o</sup>                                                                                                                                                                  | 2.383(3)   | Cd2-O10 <sup>o</sup>                  | 2.279(3)   | O3-C2                                  | 1.263(4)   | N2-C5                               | 1.487(7)   |
| Cd1-O10 <sup>o</sup>                                                                                                                                                                 | 2.481(3)   | Cd2-S1 <sup>q</sup>                   | 2.9742(10) | O1-C1                                  | 1.258(5)   | C3-C4 <sup>u</sup>                  | 1.505(6)   |
| Cd1-O1W                                                                                                                                                                              | 2.313(3)   | S1-O6                                 | 1.528(3)   | O2-C1                                  | 1.239(5)   | C5-C6 <sup>t</sup>                  | 1.512(7)   |
| Cd2-O1                                                                                                                                                                               | 2.284(3)   | S1-O5                                 | 1.529(3)   | O4-C2                                  | 1.240(5)   |                                     |            |
| O5-Cd1-O3                                                                                                                                                                            | 90.32(11)  | O10 <sup>o</sup> -Cd2-O7 <sup>q</sup> | 91.32(10)  | S2-O10-Cd2 <sup>s</sup>                | 129.50(16) | N2-C6-C5 <sup>t</sup>               | 110.9(4)   |
| O5-Cd1-O1W                                                                                                                                                                           | 175.84(10) | O1-Cd2-O7 <sup>q</sup>                | 90.51(11)  | S2-O10-Cd1 <sup>s</sup>                | 97.98(13)  | N2-C6-H6A                           | 109.5      |
| O3-Cd1-O1W                                                                                                                                                                           | 87.91(11)  | O8-Cd2-O6 <sup>q</sup>                | 88.24(10)  | Cd2 <sup>s</sup> -O10-Cd1 <sup>s</sup> | 104.74(11) | C5 <sup>t</sup> -C6-H6A             | 109.5      |
| O5-Cd1-O2 <sup>o</sup>                                                                                                                                                               | 97.22(11)  | O9 <sup>p</sup> -Cd2-O6 <sup>q</sup>  | 93.69(10)  | S2-O8-Cd2                              | 120.04(14) | N2-C6-H6B                           | 109.5      |
| O3-Cd1-O2 <sup>o</sup>                                                                                                                                                               | 79.68(10)  | O10 <sup>o</sup> -Cd2-O6 <sup>q</sup> | 152.27(10) | S2-O8-Cd1 <sup>s</sup>                 | 101.72(13) | C5 <sup>t</sup> -C6-H6B             | 109.5      |
| O1W-Cd1-O2 <sup>o</sup>                                                                                                                                                              | 86.16(11)  | O1-Cd2-O6 <sup>q</sup>                | 101.86(11) | Cd2-O8-Cd1 <sup>s</sup>                | 123.96(11) | H6A-C6-H6B                          | 108.1      |
| O5-Cd1-O8 <sup>o</sup>                                                                                                                                                               | 95.67(10)  | O7 <sup>q</sup> -Cd2-O6 <sup>q</sup>  | 61.11(10)  | S1-O7-Cd2 <sup>r</sup>                 | 99.10(14)  | H2WA-O2WA-H2WB                      | 109.5      |
| O3-Cd1-O8 <sup>o</sup>                                                                                                                                                               | 167.05(9)  | O8-Cd2-S1 <sup>q</sup>                | 118.53(7)  | C1-O2-Cd1 <sup>s</sup>                 | 137.7(3)   | H2WC-O2WB-H2WD                      | 111.2      |
| O1W-Cd1-O8 <sup>o</sup>                                                                                                                                                              | 86.82(10)  | O9 <sup>p</sup> -Cd2-S1 <sup>q</sup>  | 96.94(7)   | Cd1-O1W-H1WA                           | 114(5)     | C3-N1-C4                            | 111.5(3)   |
| O2 <sup>o</sup> -Cd1-O8 <sup>o</sup>                                                                                                                                                 | 88.16(9)   | O10 <sup>o</sup> -Cd2-S1 <sup>q</sup> | 121.93(7)  | Cd1-O1W-H1WB                           | 110(5)     | C3-N1-H1A                           | 109.3      |
| O5-Cd1-O10 <sup>o</sup>                                                                                                                                                              | 84.11(10)  | O1-Cd2-S1 <sup>q</sup>                | 98.39(8)   | H1WA-O1W-H1WB                          | 104(4)     | C4-N1-H1A                           | 109.3      |
| O3-Cd1-O10 <sup>o</sup>                                                                                                                                                              | 134.18(9)  | O7 <sup>q</sup> -Cd2-S1 <sup>q</sup>  | 30.61(7)   | O4-C2-O3                               | 124.5(4)   | C3-N1-H1B                           | 109.3      |
| O1W-Cd1-O10 <sup>o</sup>                                                                                                                                                             | 94.43(10)  | O6 <sup>q</sup> -Cd2-S1 <sup>q</sup>  | 30.55(7)   | O4-C2-C1                               | 118.7(3)   | C4-N1-H1B                           | 109.3      |
| O2 <sup>o</sup> -Cd1-O10 <sup>o</sup>                                                                                                                                                | 146.13(9)  | O9-S2-O10                             | 105.51(16) | O3-C2-C1                               | 116.8(3)   | H1A-N1-H1B                          | 108        |
| O8 <sup>o</sup> -Cd1-O10 <sup>o</sup>                                                                                                                                                | 58.13(8)   | O9-S2-O8                              | 104.30(15) | C6-N2-C5                               | 111.6(4)   | N1-C3-C4 <sup>u</sup>               | 110.0(3)   |
| O5-Cd1-O1                                                                                                                                                                            | 89.91(10)  | O10-S2-O8                             | 100.41(15) | C6-N2-H2A                              | 109.3      | N1-C3-H3A                           | 109.7      |
| O3-Cd1-O1                                                                                                                                                                            | 67.74(9)   | O6-S1-O5                              | 104.44(16) | C5-N2-H2A                              | 109.3      | C4 <sup>u</sup> -C3-H3A             | 109.7      |
| O1W-Cd1-O1                                                                                                                                                                           | 85.94(10)  | O6-S1-O7                              | 101.14(16) | C6-N2-H2B                              | 109.3      | N1-C3-H3B                           | 109.7      |
| O2 <sup>o</sup> -Cd1-O1                                                                                                                                                              | 146.70(10) | O5-S1-O7                              | 104.67(17) | C5-N2-H2B                              | 109.3      | C4 <sup>u</sup> -C3-H3B             | 109.7      |
| O8 <sup>o</sup> -Cd1-O1                                                                                                                                                              | 123.58(9)  | O6-S1-Cd2 <sup>r</sup>                | 50.95(11)  | H2A-N2-H2B                             | 108        | H3A-C3-H3B                          | 108.2      |
| O10 <sup>o</sup> -Cd1-O1                                                                                                                                                             | 66.81(9)   | O5-S1-Cd2 <sup>r</sup>                | 110.72(11) | O2-C1-O1                               | 128.3(3)   | N1-C4-C3 <sup>u</sup>               | 110.7(3)   |
| O8-Cd2-O9 <sup>p</sup>                                                                                                                                                               | 89.78(9)   | O7-S1-Cd2 <sup>r</sup>                | 50.29(11)  | O2-C1-C2                               | 117.6(3)   | N1-C4-H4A                           | 109.5      |
| O8-Cd2-O10 <sup>o</sup>                                                                                                                                                              | 118.27(10) | S1-O5-Cd1                             | 120.98(16) | O1-C1-C2                               | 114.0(3)   | C3 <sup>u</sup> -C4-H4A             | 109.5      |

## ARTICLE

## Journal Name

|                                       |            |                        |            |                         |          |                         |       |
|---------------------------------------|------------|------------------------|------------|-------------------------|----------|-------------------------|-------|
| O9 <sup>p</sup> -Cd2-O10 <sup>o</sup> | 94.38(10)  | S1-O6-Cd2 <sup>r</sup> | 98.50(14)  | N2-C5-C6 <sup>t</sup>   | 109.3(4) | N1-C4-H4B               | 109.5 |
| O8-Cd2-O1                             | 86.95(10)  | C2-O3-Cd1              | 122.1(2)   | N2-C5-H5A               | 109.8    | C3 <sup>u</sup> -C4-H4B | 109.5 |
| O9 <sup>p</sup> -Cd2-O1               | 163.99(10) | S2-O9-Cd2 <sup>p</sup> | 120.17(14) | C6 <sup>t</sup> -C5-H5A | 109.8    | H4A-C4-H4B              | 108.1 |
| O10 <sup>o</sup> -Cd2-O1              | 73.54(10)  | C1-O1-Cd2              | 139.5(2)   | N2-C5-H5B               | 109.8    |                         |       |
| O8-Cd2-O7 <sup>q</sup>                | 148.01(10) | C1-O1-Cd1              | 115.9(2)   | C6 <sup>t</sup> -C5-H5B | 109.8    |                         |       |
| O9 <sup>p</sup> -Cd2-O7 <sup>q</sup>  | 100.43(10) | Cd2-O1-Cd1             | 104.59(11) | H5A-C5-H5B              | 108.3    |                         |       |

#Symmetry transformations used to generate equivalent atoms:

(a)  $x, -y+1/2, z-1/2$ ; (b)  $x, y, z+1$ ; (c)  $x, y, z-1$ ; (d)  $x, -y+1/2, z+1/2$ ; (e)  $-x+1, -y, -z+2$ ; (f)  $-x+1, -y, z$ ; (g)  $-y+1/2, x-1/2, -z+1/2$ ; (h)  $y+1/2, -x+1/2, -z+1/2$ ; (i)  $y+1, x-1, z$ ; (j)  $x, y, -z$ ; (k)  $-x+2, -y, z$ ; (l)  $-x+2, -y, -z$ ; (m)  $y, x, z$ ; (n)  $-y+2, -x+2, -z+1$ ; (o)  $x-1, y, z$ ; (p)  $-x+1, -y+2, -z+2$ ; (q)  $x, y+1, z$ ; (r)  $x, y-1, z$ ; (s)  $x+1, y, z$ ; (t)  $-x+2, -y+1, -z+1$ ; (u)  $-x+1, -y+1, -z+2$



**Table S3.** Atomic coordinates ( $\times 10^4$ ) and equivalent isotropic displacement parameters ( $\text{\AA}^2 \times 10^3$ ) for **1-3** U(eq) is defined as one third of the trace of the orthogonalized  $U_{ij}$  tensor.

|                                                                                                                                                                                       | x        | y        | z        | U(eq) |        | x        | y         | z        | U(eq)   |
|---------------------------------------------------------------------------------------------------------------------------------------------------------------------------------------|----------|----------|----------|-------|--------|----------|-----------|----------|---------|
| <b>[Zn<sub>2</sub>(SO<sub>3</sub>)<sub>2</sub>(C<sub>2</sub>O<sub>4</sub>)<sub>0.5</sub>(C<sub>6</sub>N<sub>2</sub>H<sub>13</sub>)]·(H<sub>2</sub>O)<sub>2</sub>, 1</b>               |          |          |          |       |        |          |           |          |         |
| Zn1                                                                                                                                                                                   | 3448(1)  | 1022(1)  | 8731(1)  | 19(1) | O1W    | 8490(7)  | -230(1)   | 8584(6)  | 142(2)  |
| Zn2                                                                                                                                                                                   | 5156(1)  | 2421(1)  | 5152(1)  | 20(1) | O2W    | 5724(7)  | 266(2)    | 6399(8)  | 165(2)  |
| S1                                                                                                                                                                                    | 2865(1)  | 1883(1)  | 11465(1) | 20(1) | N1     | 1093(2)  | 1164(1)   | 6383(2)  | 18(1)   |
| S2                                                                                                                                                                                    | 6585(1)  | 1598(1)  | 8507(1)  | 17(1) | N2     | -1603(2) | 1342(1)   | 3549(2)  | 25(1)   |
| O1                                                                                                                                                                                    | 2727(2)  | 1294(1)  | 10632(2) | 27(1) | C1     | 5786(2)  | 150(1)    | 10711(2) | 19(1)   |
| O2                                                                                                                                                                                    | 3014(2)  | 2288(1)  | 10056(2) | 26(1) | C2     | 1269(3)  | 948(1)    | 4750(3)  | 34(1)   |
| O3                                                                                                                                                                                    | 4623(2)  | 1902(1)  | 3052(2)  | 28(1) | C3     | -352(2)  | 1037(1)   | 3024(3)  | 29(1)   |
| O4                                                                                                                                                                                    | 4713(2)  | 1431(1)  | 7525(2)  | 30(1) | C4     | -373(2)  | 874(1)    | 6522(3)  | 31(1)   |
| O5                                                                                                                                                                                    | 6839(2)  | 2009(1)  | 7189(2)  | 23(1) | C5     | -2017(2) | 984(1)    | 4841(3)  | 28(1)   |
| O6                                                                                                                                                                                    | 6677(2)  | 1951(1)  | 10137(2) | 25(1) | C6     | 707(3)   | 1778(1)   | 6126(3)  | 36(1)   |
| O7                                                                                                                                                                                    | 5762(2)  | 678(1)   | 10739(2) | 25(1) | C7     | -872(3)  | 1896(1)   | 4413(3)  | 33(1)   |
| O8                                                                                                                                                                                    | 3028(2)  | 165(1)   | 8265(2)  | 27(1) |        |          |           |          |         |
| <b>[C<sub>4</sub>N<sub>2</sub>H<sub>12</sub>]<sub>0.5</sub> [Zn<sub>2</sub>(SO<sub>3</sub>)<sub>2</sub>(C<sub>2</sub>O<sub>4</sub>)<sub>0.5</sub>(H<sub>2</sub>O)<sub>2</sub>], 2</b> |          |          |          |       |        |          |           |          |         |
| Zn1                                                                                                                                                                                   | 8225(1)  | -1776(1) | 0        | 11(1) | O3     | 9287(3)  | -713(3)   | 1484(5)  | 27(1)   |
| Zn2                                                                                                                                                                                   | 5000     | 0        | 2500     | 12(1) | O1W    | 7370(3)  | -2630(3)  | 1786(5)  | 18(1)   |
| S1                                                                                                                                                                                    | 6834(1)  | 686(1)   | 0        | 12(1) | N1     | 9115(8)  | 9115(8)   | 5000     | 145(12) |
| O1                                                                                                                                                                                    | 6737(4)  | -668(4)  | 0        | 15(1) | C1     | 10000    | 0         | 851(8)   | 15(2)   |
| O2                                                                                                                                                                                    | 6086(3)  | 1087(3)  | 1373(3)  | 14(1) | C2     | 8854(10) | 10352(10) | 4558(13) | 64(5)   |
| <b>[C<sub>4</sub>N<sub>2</sub>H<sub>12</sub>][Cd<sub>2</sub>(SO<sub>3</sub>)<sub>2</sub>(C<sub>2</sub>O<sub>4</sub>)(H<sub>2</sub>O)]·(H<sub>2</sub>O), 3</b>                         |          |          |          |       |        |          |           |          |         |
| Cd(1)                                                                                                                                                                                 | -1086(1) | 8084(1)  | 7714(1)  | 10(1) | O(1W)  | -2477(5) | 10939(4)  | 7189(2)  | 17(1)   |
| Cd(2)                                                                                                                                                                                 | 2526(1)  | 10389(1) | 8640(1)  | 11(1) | O(4)   | 3846(6)  | 6991(6)   | 5728(2)  | 37(1)   |
| S(2)                                                                                                                                                                                  | 7612(2)  | 9613(1)  | 9380(1)  | 10(1) | C(2)   | 2785(6)  | 7349(5)   | 6374(2)  | 16(1)   |
| S(1)                                                                                                                                                                                  | 1216(2)  | 3777(1)  | 7673(1)  | 14(1) | N(2)   | 8322(6)  | 6278(6)   | 5438(2)  | 30(1)   |
| O(5)                                                                                                                                                                                  | 525(5)   | 5322(3)  | 8217(2)  | 16(1) | C(1)   | 3994(6)  | 7839(5)   | 7079(2)  | 13(1)   |
| O(6)                                                                                                                                                                                  | 3555(5)  | 2666(4)  | 7954(2)  | 18(1) | C(5)   | 8718(8)  | 6596(8)   | 4565(3)  | 32(1)   |
| O(3)                                                                                                                                                                                  | 762(5)   | 7366(4)  | 6505(2)  | 18(1) | C(6)   | 8854(8)  | 4383(7)   | 5663(3)  | 29(1)   |
| O(9)                                                                                                                                                                                  | 7648(5)  | 8466(3)  | 10147(2) | 13(1) | O(2WA) | 3360(30) | 9761(15)  | 4481(7)  | 91(6)   |
| O(1)                                                                                                                                                                                  | 2670(5)  | 8564(4)  | 7636(2)  | 19(1) | O(2WB) | 1520(30) | 9760(17)  | 4562(10) | 82(7)   |
| O(10)                                                                                                                                                                                 | 9992(4)  | 8928(4)  | 8998(2)  | 15(1) | N(1)   | 3392(6)  | 4671(4)   | 9500(2)  | 15(1)   |

## ARTICLE

## Journal Name

|      |         |         |         |       |      |         |         |          |       |
|------|---------|---------|---------|-------|------|---------|---------|----------|-------|
| O(8) | 6247(4) | 8955(3) | 8797(2) | 12(1) | C(3) | 5532(7) | 4907(6) | 9149(2)  | 17(1) |
| O(7) | -228(5) | 2618(4) | 7980(2) | 20(1) | C(4) | 2648(7) | 5656(6) | 10240(3) | 20(1) |
| O(2) | 6072(5) | 7531(4) | 7016(2) | 21(1) |      |         |         |          |       |

**Table S4.** Anisotropic displacement parameters ( $\text{\AA}^2 \times 10^3$ ) for complex **1-3**. The anisotropic displacement factor exponent takes the form:  $-\pi^2 [h^2 a^{*2} U_{11} + \dots + 2 h k a^* b^* U_{12}]$ 

|                                                                                                                                                                                       | U11   | U22   | U33   | U23    | U13   | U12    |        | U11     | U22     | U33    | U23    | U13     | U12      |
|---------------------------------------------------------------------------------------------------------------------------------------------------------------------------------------|-------|-------|-------|--------|-------|--------|--------|---------|---------|--------|--------|---------|----------|
| <b>[Zn<sub>2</sub>(SO<sub>3</sub>)<sub>2</sub>(C<sub>2</sub>O<sub>4</sub>)<sub>0.5</sub>(C<sub>6</sub>N<sub>2</sub>H<sub>12</sub>)]·(H<sub>2</sub>O)<sub>2</sub>, 1</b>               |       |       |       |        |       |        |        |         |         |        |        |         |          |
| Zn1                                                                                                                                                                                   | 18(1) | 16(1) | 17(1) | 1(1)   | 2(1)  | 0(1)   | O1W    | 287(6)  | 52(2)   | 192(4) | -6(2)  | 204(5)  | -18(2)   |
| Zn2                                                                                                                                                                                   | 21(1) | 20(1) | 15(1) | -1(1)  | 5(1)  | 0(1)   | O2W    | 209(5)  | 101(3)  | 256(6) | -17(3) | 167(5)  | -7(3)    |
| S1                                                                                                                                                                                    | 21(1) | 20(1) | 18(1) | -3(1)  | 8(1)  | -1(1)  | N1     | 17(1)   | 17(1)   | 15(1)  | 0(1)   | 2(1)    | 0(1)     |
| S2                                                                                                                                                                                    | 17(1) | 17(1) | 14(1) | 1(1)   | 4(1)  | 2(1)   | N2     | 19(1)   | 31(1)   | 17(1)  | 1(1)   | -1(1)   | 3(1)     |
| O1                                                                                                                                                                                    | 37(1) | 21(1) | 24(1) | -7(1)  | 13(1) | -5(1)  | C1     | 17(1)   | 19(1)   | 17(1)  | 1(1)   | 2(1)    | 0(1)     |
| O2                                                                                                                                                                                    | 25(1) | 28(1) | 23(1) | 4(1)   | 6(1)  | -3(1)  | C2     | 24(1)   | 53(2)   | 17(1)  | -4(1)  | 3(1)    | 12(1)    |
| O3                                                                                                                                                                                    | 30(1) | 29(1) | 17(1) | -7(1)  | 2(1)  | 3(1)   | C3     | 22(1)   | 42(1)   | 18(1)  | -4(1)  | 5(1)    | 2(1)     |
| O4                                                                                                                                                                                    | 22(1) | 42(1) | 20(1) | 5(1)   | 2(1)  | -10(1) | C4     | 20(1)   | 40(1)   | 28(1)  | 13(1)  | 5(1)    | -2(1)    |
| O5                                                                                                                                                                                    | 22(1) | 28(1) | 18(1) | 6(1)   | 7(1)  | 0(1)   | C5     | 19(1)   | 36(1)   | 24(1)  | -1(1)  | 5(1)    | -2(1)    |
| O6                                                                                                                                                                                    | 33(1) | 25(1) | 15(1) | -1(1)  | 7(1)  | 6(1)   | C6     | 37(1)   | 17(1)   | 31(1)  | 0(1)   | -8(1)   | 2(1)     |
| O7                                                                                                                                                                                    | 23(1) | 16(1) | 25(1) | 1(1)   | -2(1) | 0(1)   | C7     | 33(1)   | 22(1)   | 31(1)  | 5(1)   | -1(1)   | 6(1)     |
| O8                                                                                                                                                                                    | 22(1) | 18(1) | 27(1) | 1(1)   | -5(1) | 1(1)   |        |         |         |        |        |         |          |
| <b>[C<sub>4</sub>N<sub>2</sub>H<sub>12</sub>]<sub>0.5</sub> [Zn<sub>2</sub>(SO<sub>3</sub>)<sub>2</sub>(C<sub>2</sub>O<sub>4</sub>)<sub>0.5</sub>(H<sub>2</sub>O)<sub>2</sub>], 2</b> |       |       |       |        |       |        |        |         |         |        |        |         |          |
| Zn1                                                                                                                                                                                   | 11(1) | 11(1) | 10(1) | 0      | 0     | 0(1)   | O3     | 35(2)   | 35(2)   | 11(2)  | 1(1)   | 1(1)    | -20(2)   |
| Zn2                                                                                                                                                                                   | 10(1) | 10(1) | 14(1) | 0      | 0     | 0      | O1W    | 17(1)   | 17(1)   | 20(2)  | 7(1)   | 7(1)    | 3(2)     |
| S1                                                                                                                                                                                    | 11(1) | 11(1) | 13(1) | 0      | 0     | -2(1)  | N1     | 198(18) | 198(18) | 38(7)  | 0      | 0       | -170(20) |
| O1                                                                                                                                                                                    | 14(2) | 12(2) | 20(2) | 0      | 0     | 1(2)   | C1     | 17(2)   | 17(2)   | 9(3)   | 0      | 0       | 0(3)     |
| O2                                                                                                                                                                                    | 16(1) | 13(1) | 14(1) | -2(1)  | 2(1)  | -3(1)  | C2     | 37(6)   | 83(9)   | 73(10) | -70(7) | -37(6)  | 39(6)    |
| <b>[[C<sub>4</sub>N<sub>2</sub>H<sub>12</sub>][Cd<sub>2</sub>(SO<sub>3</sub>)<sub>2</sub>(C<sub>2</sub>O<sub>4</sub>)(H<sub>2</sub>O)]·(H<sub>2</sub>O)], 3</b>                       |       |       |       |        |       |        |        |         |         |        |        |         |          |
| Cd(1)                                                                                                                                                                                 | 7(1)  | 13(1) | 12(1) | -4(1)  | 1(1)  | -3(1)  | O(1W)  | 13(1)   | 15(1)   | 24(2)  | -1(1)  | -3(1)   | -5(1)    |
| Cd(2)                                                                                                                                                                                 | 7(1)  | 12(1) | 13(1) | -3(1)  | 0(1)  | -4(1)  | O(4)   | 13(2)   | 80(3)   | 24(2)  | -28(2) | 7(1)    | -19(2)   |
| S(2)                                                                                                                                                                                  | 7(1)  | 12(1) | 11(1) | -3(1)  | 1(1)  | -4(1)  | C(2)   | 6(2)    | 26(2)   | 18(2)  | -12(2) | 1(1)    | -3(1)    |
| S(1)                                                                                                                                                                                  | 16(1) | 11(1) | 14(1) | -2(1)  | -3(1) | -3(1)  | N(2)   | 7(2)    | 58(3)   | 28(2)  | -23(2) | 3(1)    | -10(2)   |
| O(5)                                                                                                                                                                                  | 18(1) | 10(1) | 17(1) | -3(1)  | -3(1) | -2(1)  | C(1)   | 10(2)   | 17(2)   | 15(2)  | -4(1)  | 0(1)    | -7(1)    |
| O(6)                                                                                                                                                                                  | 12(1) | 14(1) | 27(2) | -1(1)  | 2(1)  | -3(1)  | C(5)   | 20(2)   | 51(3)   | 29(2)  | -13(2) | -2(2)   | -11(2)   |
| O(3)                                                                                                                                                                                  | 9(1)  | 32(2) | 17(1) | -9(1)  | 2(1)  | -11(1) | C(6)   | 19(2)   | 52(3)   | 21(2)  | -13(2) | 0(2)    | -16(2)   |
| O(9)                                                                                                                                                                                  | 13(1) | 14(1) | 11(1) | -2(1)  | 0(1)  | -6(1)  | O(2WA) | 126(15) | 73(7)   | 69(7)  | -8(5)  | -28(8)  | -20(7)   |
| O(1)                                                                                                                                                                                  | 11(1) | 28(2) | 19(1) | -14(1) | 5(1)  | -7(1)  | O(2WB) | 99(17)  | 76(10)  | 72(10) | 11(8)  | -18(10) | -26(10)  |

## ARTICLE

## Journal Name

|       |       |       |       |        |       |       |      |       |       |       |       |       |       |
|-------|-------|-------|-------|--------|-------|-------|------|-------|-------|-------|-------|-------|-------|
| O(10) | 8(1)  | 20(1) | 18(1) | -5(1)  | 5(1)  | -6(1) | N(1) | 13(2) | 18(2) | 16(2) | 1(1)  | -5(1) | -8(1) |
| O(8)  | 6(1)  | 16(1) | 13(1) | -5(1)  | -2(1) | -3(1) | C(3) | 11(2) | 26(2) | 16(2) | -4(2) | 0(1)  | -8(2) |
| O(7)  | 12(1) | 17(1) | 33(2) | -2(1)  | -7(1) | -7(1) | C(4) | 11(2) | 26(2) | 21(2) | -5(2) | 1(2)  | -5(2) |
| O(2)  | 8(1)  | 35(2) | 22(2) | -12(1) | 1(1)  | -9(1) |      |       |       |       |       |       |       |
